# Supplementary material for: Biomarkers of DNA Damage Response Enable Flow Cytometry-Based Diagnostic to Identify Inborn DNA Repair Defects in Primary Immunodeficiencies
Source: PubMed Central journal article supplement (PMC8821069; doi:10.1007/s10875-021-01156-7), 2021-10-30

HD1

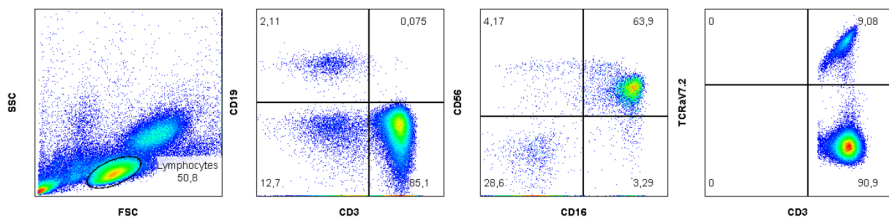

HD2

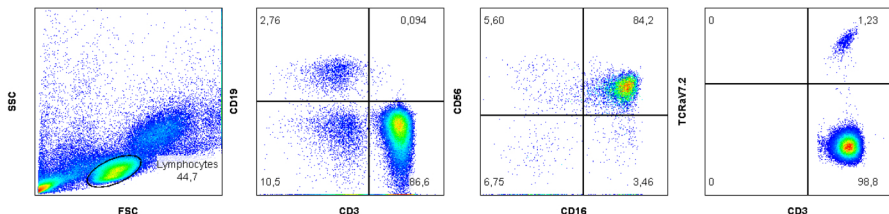

ART3

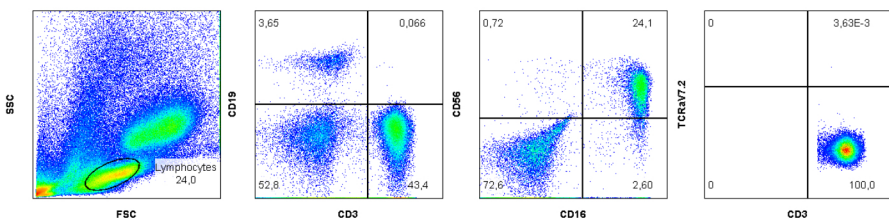

ART4

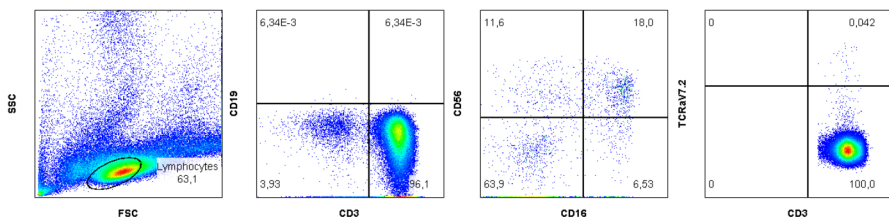

DNA-PKcs1

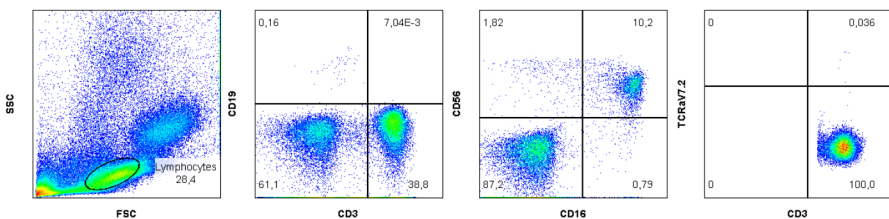

XLF1

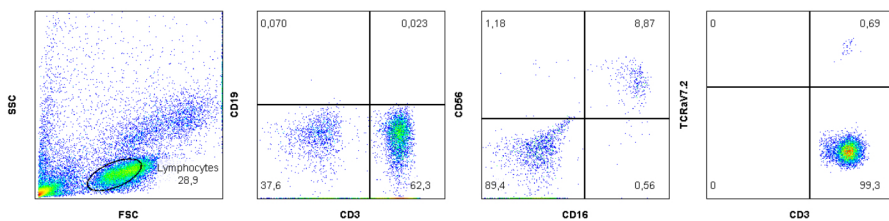

Supplement: 10875_2021_1156_MOESM2_ESM.pdf [file 10875_2021_1156_MOESM2_ESM.pdf]
